# Supplementary material for: cGAS-like receptors sense RNA and control 3′2′-cGAMP signalling in Drosophila
Source: PubMed Central journal article supplement (PMC8410604; doi:10.1038/s41586-021-03743-5), 2021-07-14
Supplement: 41586_2021_3743_MOESM3_ESM.pdf [file 41586_2021_3743_MOESM3_ESM.pdf]

**Supplementary Table 1. Summary of data collection, phasing and refinement statistics**

|                                                     | hMB21D2<br>(7LT1)         | hMB21D2<br>SeMet          | <i>Tc</i> -cGLR<br>(7LT2)                      | <i>Tc</i> -cGLR<br>SeMet                       |
|-----------------------------------------------------|---------------------------|---------------------------|------------------------------------------------|------------------------------------------------|
| <b>Data collection</b>                              |                           |                           |                                                |                                                |
| Space group                                         | I 2 2 2                   | I 2 2 2                   | P 2 <sub>1</sub> 2 <sub>1</sub> 2 <sub>1</sub> | P 2 <sub>1</sub> 2 <sub>1</sub> 2 <sub>1</sub> |
| Cell dimensions                                     |                           |                           |                                                |                                                |
| <i>a</i> , <i>b</i> , <i>c</i> (Å)                  | 102.17, 127.82,<br>198.24 | 102.15, 127.20,<br>197.60 | 57.40, 70.44,<br>104.60                        | 56.58, 70.67,<br>103.49                        |
| $\alpha$ , $\beta$ , $\gamma$ (°)                   | 90.0, 90.0, 90.0          | 90.0, 90.0, 90.0          | 90.00, 90.00, 90.00                            | 90.00, 90.00, 90.00                            |
| Resolution (Å)                                      | 49.56–2.40<br>(2.48–2.40) | 49.40–2.99<br>(3.17–2.99) | 41.99–1.58<br>(1.61–1.58)                      | 44.17–1.65<br>(1.68–1.65)                      |
| <i>R</i> <sub>pim</sub>                             | 3.8 (82.3)                | 4.9 (45.8)                | 3.7 (61.2)                                     | 2.1 (81.6)                                     |
| <i>I</i> / $\sigma$ ( <i>I</i> )                    | 12.6 (1.3)                | 17.3 (2.8)                | 9.6 (1.1)                                      | 23.8 (1.3)                                     |
| Completeness (%)                                    | 99.6 (99.8)               | 99.5 (97.3)               | 98.4 (98.1)                                    | 100.0 (100.0)                                  |
| Redundancy                                          | 7.0 (6.9)                 | 53.0 (49.9)               | 2.7 (2.6)                                      | 53.5 (43.3)                                    |
| <b>Refinement</b>                                   |                           |                           |                                                |                                                |
| Resolution (Å)                                      | 49.56–2.40                | –                         | 41.99–1.58                                     | –                                              |
| No. reflections                                     |                           |                           |                                                |                                                |
| Total                                               | 353973                    | 1398790                   | 152854                                         | 2712556                                        |
| Unique                                              | 50814                     | 26374                     | 57602                                          | 50722                                          |
| Free                                                | 1983                      | –                         | 2000                                           | –                                              |
| <i>R</i> <sub>work</sub> / <i>R</i> <sub>free</sub> | 24.8 / 26.9               | –                         | 18.4 / 21.4                                    | –                                              |
| No. atoms                                           |                           |                           |                                                |                                                |
| Protein                                             | 6398                      | –                         | 3187                                           | –                                              |
| Ligand/ion                                          | 15 (SO <sub>4</sub> )     | –                         | 1 (Mn <sup>2+</sup> )                          | –                                              |
| Water                                               | –                         | –                         | 543                                            | –                                              |
| <i>B</i> -factors                                   |                           |                           |                                                |                                                |
| Protein                                             | 97.0                      | –                         | 25.6                                           | –                                              |
| Ligand/ion                                          | 130.4                     | –                         | 34.0                                           | –                                              |
| Water                                               | –                         | –                         | 36.5                                           | –                                              |
| R.m.s. deviations                                   |                           |                           |                                                |                                                |
| Bond lengths (Å)                                    | 0.002                     | –                         | 0.004                                          | –                                              |
| Bond angles (°)                                     | 0.40                      | –                         | 0.68                                           | –                                              |

\*All datasets were collected from individual crystals. \*Values in parentheses are for the highest resolution shell.

**Supplementary Table 1. Summary of data collection, phasing and refinement statistics**

|                                       | dSTING<br>(7MWY)          | dSTING<br>SeMet           | dSTING–<br>3'2'-cGAMP<br>(7MWZ) | dSTING–<br>3'2'-cGAMP<br>SeMet |
|---------------------------------------|---------------------------|---------------------------|---------------------------------|--------------------------------|
| <b>Data collection</b>                |                           |                           |                                 |                                |
| Space group                           | P 3 <sub>2</sub> 2 1      | P 3 <sub>2</sub> 2 1      | P 1 2 <sub>1</sub> 1            | P 1 2 <sub>1</sub> 1           |
| Cell dimensions<br><i>a, b, c</i> (Å) | 135.28, 135.28,<br>60.06  | 135.68, 135.68,<br>59.93  | 50.92, 95.05,<br>140.14         | 51.05, 95.71,<br>142.31        |
| $\alpha, \beta, \gamma$ (°)           | 90.0, 90.0, 120.0         | 90.0, 90.0, 120.0         | 90.00, 93.93, 90.00             | 90.00, 94.57, 90.00            |
| Resolution (Å)                        | 44.91–1.84<br>(1.88–1.84) | 44.92–2.40<br>(2.49–2.40) | 48.84–2.00<br>(2.04–2.00)       | 49.16–2.89<br>(3.05–2.89)      |
| $R_{\text{pim}}$                      | 3.5 (65.6)                | 3.7 (36.2)                | 3.2 (75.9)                      | 4.4 (35.9)                     |
| $I / \sigma(I)$                       | 11.2 (1.1)                | 19.4 (3.1)                | 10.7 (1.2)                      | 11.4 (2.9)                     |
| Completeness (%)                      | 99.7 (98.6)               | 99.7 (98.5)               | 99.7 (99.1)                     | 99.7 (98.3)                    |
| Redundancy                            | 5.8 (5.8)                 | 31.4 (31.1)               | 7.1 (7.1)                       | 28.1 (26.4)                    |
| <b>Refinement</b>                     |                           |                           |                                 |                                |
| Resolution (Å)                        | 44.91–1.84                | –                         | 48.84–2.00                      | –                              |
| No. reflections                       |                           |                           |                                 |                                |
| Total                                 | 318531                    | 785751                    | 639566                          | 857564                         |
| Unique                                | 54801                     | 25033                     | 89677                           | 30535                          |
| Free                                  | 2005                      | –                         | 2006                            | –                              |
| $R_{\text{work}} / R_{\text{free}}$   | 18.0 / 19.4               | –                         | 24.7 / 28.3                     | –                              |
| No. atoms                             |                           |                           |                                 |                                |
| Protein                               | 2845                      | –                         | 10943                           | –                              |
| Ligand/ion                            | –                         | –                         | 90 (3'2'-cGAMP)                 | –                              |
| Water                                 | 399                       | –                         | 511                             | –                              |
| <i>B</i> -factors                     |                           |                           |                                 |                                |
| Protein                               | 39.23                     | –                         | 62.6                            | –                              |
| Ligand/ion                            | –                         | –                         | 45.0                            | –                              |
| Water                                 | 48.12                     | –                         | 53.2                            | –                              |
| R.m.s. deviations                     |                           |                           |                                 |                                |
| Bond lengths (Å)                      | 0.014                     | –                         | 0.002                           | –                              |
| Bond angles (°)                       | 1.23                      | –                         | 0.44                            | –                              |

\*All datasets were collected from individual crystals. \*Values in parentheses are for the highest resolution shell.
